# Supplementary material for: Mycelia as a focal point for horizontal gene transfer among soil bacteria
Source: PubMed Central journal article supplement (PMC5095653; doi:10.1038/srep36390), 2016-11-04
Supplement: srep36390-s1.pdf [file srep36390-s1.pdf]

# Mycelia as a focal point for horizontal gene transfer among soil bacteria

Berthold, Tom<sup>a</sup>; Centler, Florian<sup>a</sup>; Hübschmann, Thomas<sup>a</sup>; Remer, Rita<sup>a</sup>; Thullner, Martin<sup>a</sup>; Harms, Hauke<sup>a,b</sup>; Wick, Lukas Yvo<sup>a\*</sup>

<sup>a</sup> *Helmholtz Centre for Environmental Research - UFZ, Department Environmental*

*Microbiology, Permoserstraße 15, 04318 Leipzig, Germany*

<sup>b</sup> *German Centre for Integrative Biodiversity Research (iDiv) Halle-Jena-Leipzig, Deutscher*

*Platz 5E, 04103 Leipzig, Germany*

\*Corresponding author: Lukas Y. Wick

E-mail: [lukas.wick@ufz.de](mailto:lukas.wick@ufz.de)

## Supplementary Information

### 1 **Plasmid isolation**

2 The presence of the plasmid was confirmed by using a modified alkaline lysis protocol for the  
3 isolation of large plasmids (A. M. Boronin, personal communication):

4 An overnight culture of the *Pseudomonas* strains was harvested by centrifugation and  
5 resuspended in 75 $\mu$ l 25mM Tris-HCl(pH 7.0). After addition of 75 $\mu$ l STET solution (16% (w/v)  
6 Sucrose, 10% (v/v) Triton X-100, 0,1M EDTA (pH8.0), 0,1M Tris-HCL (pH7.0), alkaline lysis was  
7 initiated by adding 300 $\mu$ l 0.2N NaOH and storing the suspension on ice for 15 minutes. After  
8 addition of 300 $\mu$ l 2M Tris-HCl and 300 $\mu$ l 10M LiCl, the suspension was kept on ice for 60  
9 minutes before centrifugation and a subsequent washing step of the DNA pellet with 70%  
10 (v/v) Ethanol. The DNA was dried, resuspended in 30 $\mu$ l TE Buffer (10mM Tris-HCl (pH 7.5),  
11 1mM EDTA (pH 8.0)) and visualized on a 0.8% agarose gel (Supplementary fig. 1).

### 12 **Theoretical derivation of contact probabilities**

13 Direct cell contact is a prerequisite for microbial horizontal gene transfer (HGT). Probabilities  
14 for such contacts depend on the degrees of freedom microbial cells experience with respect  
15 to motility. Cells populating a water cube, for example, effectively explore a three-  
16 dimensional space while cells populating a thin film of water, for example surrounding  
17 mycelial hyphae, effectively only explore a two-dimensional area. To evaluate the impact on  
18 contact probabilities, we consider a continuous water medium allowing for free random  
19 bacterial movement, which is thought to be three-, two-, or one-dimensional. Considering a  
20 particle, or bacterial cell, performing a random walk and starting at the point of origin, the  
21 probability of this particle to reside at time  $t$  within a specific domain  $\Omega_x$  is given by the

22 integral of the diffusion equation with diffusion constant  $D$  and written for  $d$  dimensions  
 23 over this domain:

$$\overline{P}_d(\Omega_x, t) = \int_{\Omega_x} \frac{1}{(4\pi Dt)^{\frac{d}{2}}} e^{-\frac{|x|^2}{4Dt}}. \quad (\text{Eq. 3})$$

24  
 25 Depending on the considered dimensionality  $d$ , the domain  $\Omega_x$  refers to a volume, an area, or  
 26 an interval with its centre located at  $x$ . The size  $\delta$  of this domain is chosen so that if two  
 27 particles populate the same domain they can be expected to have physical contact, for  
 28 example by choosing the typical diameter of the bacterium as  $\delta$ . If a second particle starts its  
 29 random walk in an initial distance of  $l$  from the first particle, the probability  $\overline{P}_d^C$  for a contact  
 30 of both particles in a given domain at time  $t$  is then given by the product of the probabilities  
 31 for both particles to reside in that same domain  $\Omega_x$ :

$$\overline{P}_d^C(\Omega_x, t) = \overline{P}_d(\Omega_x, t) \times \overline{P}_d(\Omega_{x-l}, t). \quad (\text{Eq. 4})$$

32  
 33 To compute the probability  $P_d(t)$  that a contact happens anywhere at time  $t$ , space needs to  
 34 be decomposed into a sequence of non-overlapping domains  $\Omega_i$  of short lateral length  $\delta$ .  
 35 Taking the sum over contact probabilities for all these domains yields

$$P_d(t) = \left[ \frac{\delta}{2\sqrt{2\pi Dt}} \right]^d \cdot e^{-\frac{l^2}{8Dt}}. \quad (\text{Eq. 5})$$

36 The effect of decreasing the dimensionality, for example from three to two dimensions is  
 37 then given by  $P_{d-1}(t) = P_d(t) \cdot \lambda$  with  $\lambda = \left[ \frac{2\sqrt{2\pi Dt}}{\delta} \right]$ . For typical values of  $\delta$  and  $D$  ( $\delta = 2 \mu\text{m}$ ,  
 38  $D = 1.5 \times 10^{-5} \text{ cm}^2/\text{s}$ ),  $\lambda$  amounts to  $97.1 \text{ s}^{-0.5} \cdot \sqrt{t}$ , indicating that the contact probability in

39 the lower-dimensional domain increases over time and surpasses the probability in the  
40 higher-dimensional domain by two orders of magnitude after short time (1 s).

41 Symbolic calculations were performed using Mathematica 9 (Wolfram Research Inc., IL,  
42 USA).

### 43 **Individual-based model**

44 An agar section of 4.2 mm height, comparable to the experimental setup, covering a surface  
45 of approximately 0.17 mm × 1.2 mm was horizontally discretized into square microhabitats  
46 of 3.523 μm lateral length, resulting in a two-dimensional grid of 50 × 350 microhabitats  
47 representing the agar domain in the model. A representative section of a microscopic image  
48 of actual fungal hyphae was discretized at the same resolution and added as a second layer  
49 in the model as the hyphal domain. Hyphal microhabitats were assumed to have a depth of  
50 1 μm, only supporting a single layer of bacterial cells.

51 Random bacterial movement in both the agar and the hyphal domain was simulated as  
52 Fickian diffusion with a fixed diffusion constants  $D_{agar}$  and  $D_{hyphae}$  [cm<sup>2</sup>/s], allowing cells to  
53 explore the continuous agar space and the transport network provided by the fungal  
54 hyphae. Microbial cells were allowed to migrate between the agar and hyphal domain with  
55 prescribed rate parameters  $k_{attach}$  [s<sup>-1</sup>] for hyphal attachment and  $k_{detach}$  [s<sup>-1</sup>] for hyphal  
56 detachment. Two bacterial fronts, one consisting of donor cells and the other consisting of  
57 recipient cells, were migrating towards each other in the model. Plasmid transfer was  
58 assumed to take place within both agar and hyphal microhabitats and to depend on both  
59 donor concentration  $X_D$  [cells / ml] and recipient concentration  $X_R$  [cells / ml] within the  
60 respective microhabitats. The transfer rate was given by  $\gamma \times X_D \times X_R$  with rate parameter  $\gamma$   
61 [ml/cell/min]<sup>41</sup>. The total simulation time of 5 minutes allowed for both bacterial fronts to

62 mix well, was longer than the presumed duration of plasmid transfer between bacteria<sup>52</sup>, but  
63 was shorter than the reported average lag phase between two transfer events from the  
64 same donor cell of 10-20 min<sup>21</sup>. Microbial cells were therefor allowed to only take part in  
65 one HGT event during the simulation.

66 All processes including HGT, transfer between domains, and random cell motility within  
67 domains were simulated stochastically, requiring rates to be expressed as probabilities. For  
68 example, the probability for a donor cell to transfer a plasmid to a recipient cell within a  
69 simulation time step of length  $\Delta t$  is given by  $\gamma \times X_R \times \Delta t$ . Similarly, the probability for a  
70 hyphae-attached cell to detach is given by  $k_{detach} \times \Delta t$ . Cell motility was implemented as  
71 described previously<sup>52</sup>. A time step size  $\Delta t$  of 2 ms was used.

72 Initially, 25 recipient cells were placed in each agar habitat along the top of the simulation  
73 domain boundary and 25 donor cells in each agar habitat along the bottom domain  
74 boundary, resulting in cell concentrations of  $0.48 \times 10^6$  cells/ $\mu$ l which was comparable to the  
75 inoculated cell concentration used in the experiment (ca.  $0.23 - 1.0 \times 10^6$  cells/ $\mu$ l). During  
76 the simulation, cells were added along these boundaries as necessary to maintain this  
77 concentration. According to the scanned image of the actual hyphal network, the top and  
78 bottom boundaries featured a different number of hyphal microhabitats. This leads to a  
79 difference in accessibility of the network for bacteria entering the simulation domain from  
80 both sides. To minimize these effects, we added hyphal microhabitats along the full extent of  
81 both boundaries in the model.

82 For plasmid transfer, a rate constant of  $\gamma = 3.3 \times 10^{-12}$  ml/cell/min was selected as has been  
83 reported for plasmid transfer in *Pseudomonas aeruginosa*<sup>53</sup>. For bacterial cell motility in  
84 agar, a diffusion constant of  $D_{agar} = 1.5 \times 10^{-5}$  cm<sup>2</sup>/s was selected as a typical value for  
85 swimming agar. For motility along hyphae, the diffusion constant  $D_{hyphae}$  was set to the same

86 value, or to values one order of magnitude above or below to evaluate the impact of  
87 inhibited or enhanced motility along hyphae. The ratio of the attachment and detachment  
88 rate parameters  $k_{attach}/k_{detach}$  determines the equilibrium distribution of cells between the  
89 agar and the hyphal domain. To avoid overpopulated hyphal habitats, a maximum ratio of  
90 0.2 was selected which corresponds to 25 cells residing in the agar and 5 in the hyphal  
91 habitat in equilibrium, selecting  $k_{attach} = 0.1s^{-1}$  and  $k_{detach} = 0.5s^{-1}$ . To assess the importance of  
92 the hyphal network for HGT, this ratio was also lowered by choosing smaller values for  $k_{attach}$ ,  
93 leading to fewer bacterial cells populating the hyphal network. Model results showed little  
94 stochastic variability when repeating simulations, caused by the large number of bacterial  
95 cells considered. While the ratio  $k_{attach}/k_{detach}$  determines the attractiveness of the hyphal  
96 network for bacteria, leading to lightly or densely populated networks, the magnitude of the  
97 individual parameters indicate the transfer activity of bacterial cells between the agar and  
98 the hyphal network. We varied this intensity by multiplying both parameters with the same  
99 factor  $f$ , thus keeping the ratio unchanged, covering three orders of magnitude above and  
100 below the reference values (Supplementary fig. 2). The magnitude of the exchange activity  
101 of bacteria switching between agar and the hyphal network had no effect for  $k_{attach} \geq 0.1 s^{-1}$ .  
102 Only for  $k_{attach} < 0.1 s^{-1}$ , for which the simulation time of 5 minutes was not enough to  
103 equilibrate the agar and hyphal populations, an increase in transconjugants occurred  
104 (Supplementary fig. 2).

105 We note that while the agar domain is defined to be of 4.2 mm height, it is not guaranteed  
106 that cells take advantage of the entire available volume, as is assumed in the model.  
107 Rerunning simulations with smaller effective agar volumes revealed however, that even for  
108 an effective height of 1mm, hyphal conjugation events were still dominating in all tested  
109 scenarios except for small hyphal attractiveness levels with  $k_{attach}/k_{detach} = 0.04$ .

110 **Supplementary Figures**

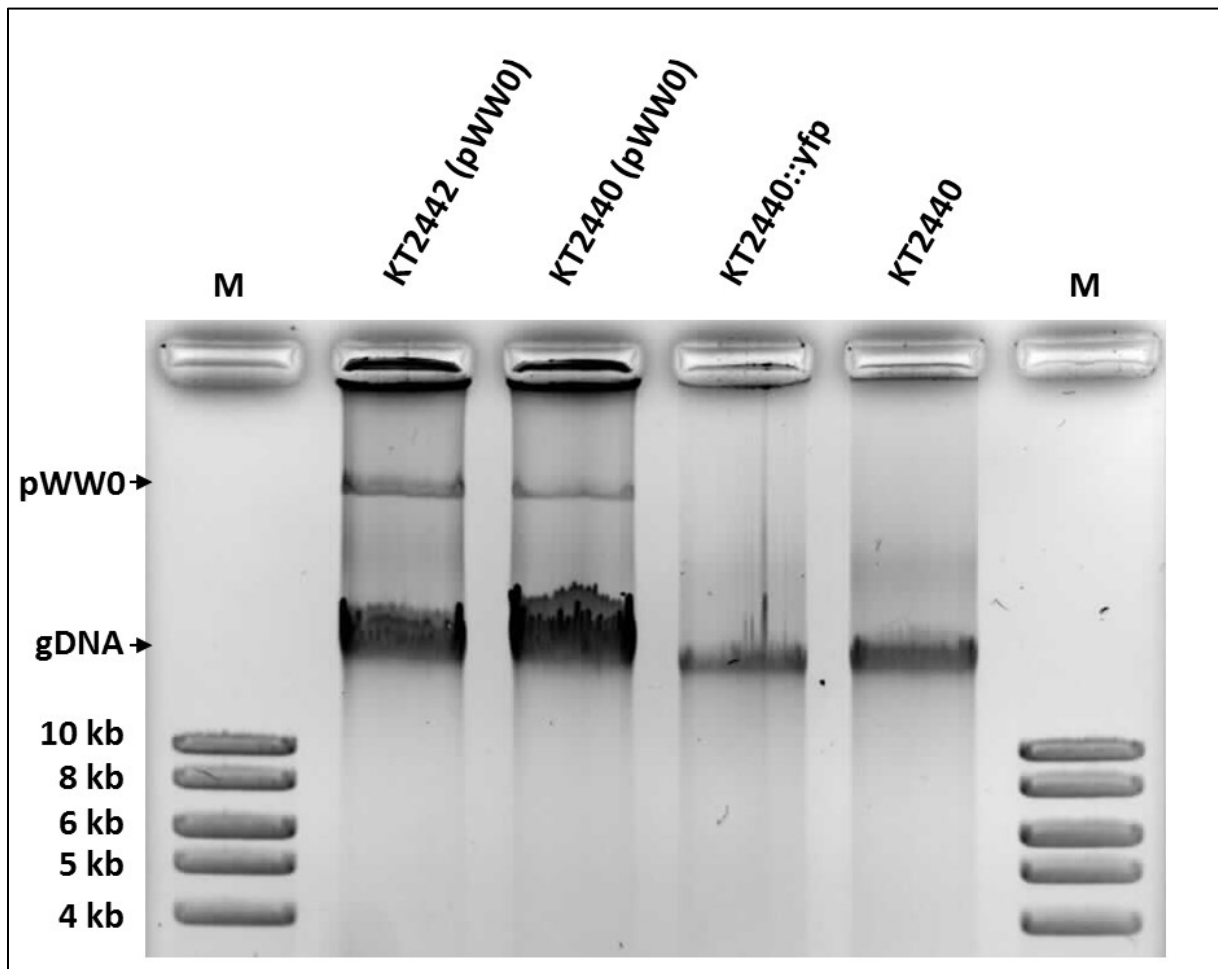

**Supplementary Figure 1:** Comparison of plasmid extractions of the *Pseudomonas putida* strains used in this study. Sample order from left to right: Donor strain *Pseudomonas putida* KT2442::dsRed-lacI<sup>q</sup>(pWW0::P<sub>lac</sub>-gfp), transconjugant strain *Pseudomonas putida* KT2440::yfp(pWW0::P<sub>lac</sub>-gfp), yfp-labeled recipient strain *Pseudomonas putida* KT2440::yfp, unlabeled recipient strain *Pseudomonas putida* KT2440. 1 kb DNA Ladder (NEB, Ipswich, MA, USA) was used as DNA marker. In the donor and transconjugant lanes, the pWW0 plasmid band is visible above the genomic DNA.

111

112

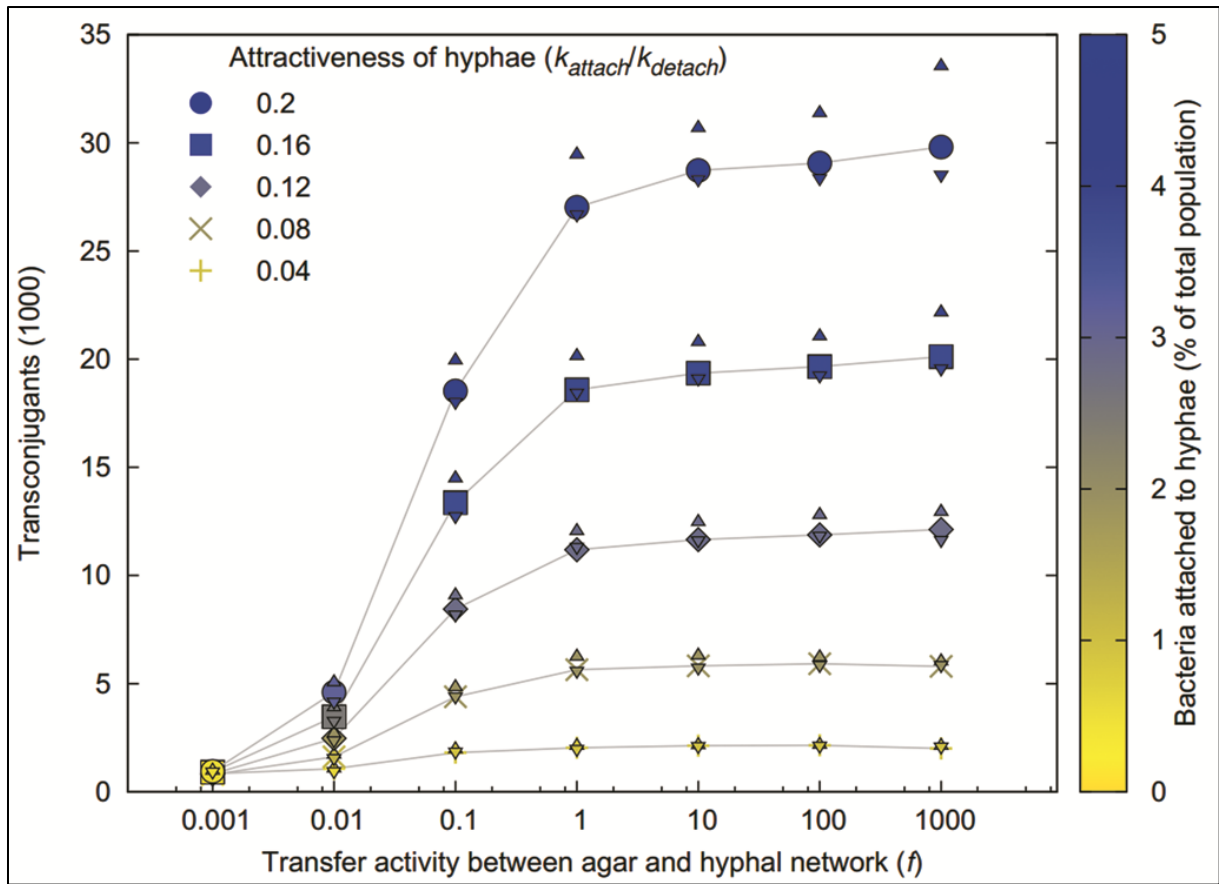

**Supplementary Figure 2:** Simulated number of transconjugants after 5 minutes of simulation time for different attractiveness levels of hyphae for bacteria ( $k_{attach} / k_{detach}$ ) and different transfer activities (setting  $k_{attach} = f \times k_{attach,ref}$  and  $k_{detach} = f \times k_{detach,ref}$ , reference values for  $k_{attach} / k_{detach} = 0.2$  were  $k_{attach,ref} = 0.1s^{-1}$  and  $k_{detach,ref} = 0.5s^{-1}$ , reference values for other ratios were obtained by changing  $k_{attach}$ ).  $D_{agar}$  and  $D_{hyphae}$  were set to  $1.5 \times 10^{-5} \text{ cm}^2/\text{s}$ . Small triangles show results for setting  $D_{hyphae} = D_{agar} \times 10$  (▲) and  $D_{hyphae} = D_{agar} / 10$  (▼).
